# Supplementary material
Source: HighWire-hosted journal article supplement (https://qdcxjkg.com/highwire/filestream/112858/field_highwire_adjunct_files/5/Figure_6.pdf)

Fig 6

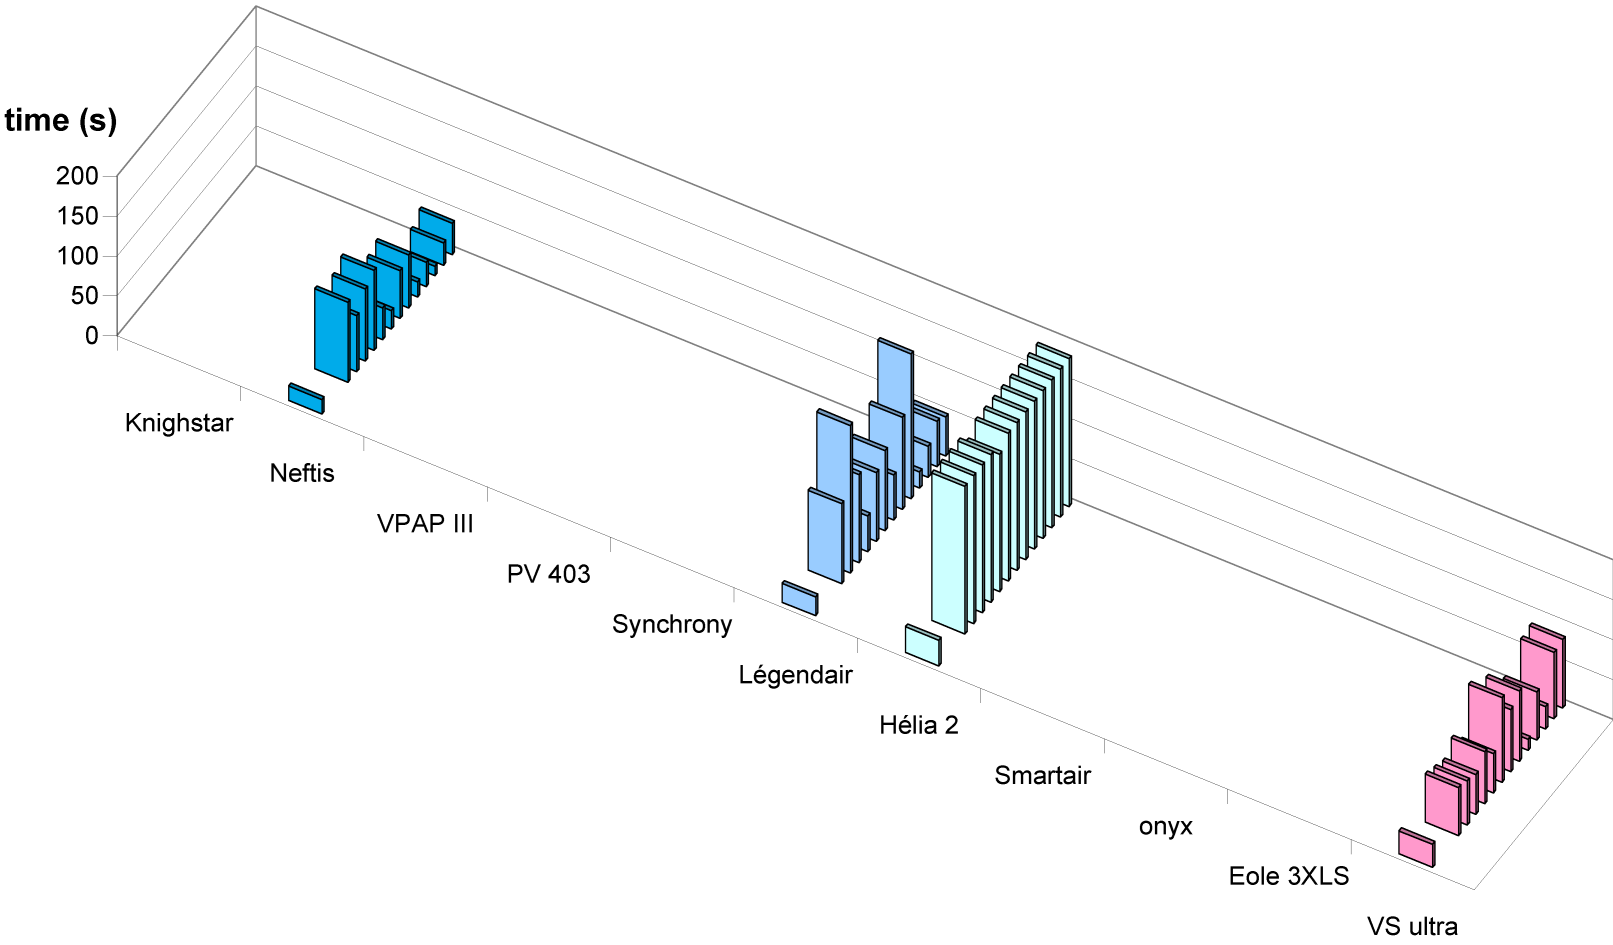

Supplement: Figure_6.pdf [file Figure_6.pdf]
